1 **Title: Model communities hint to promiscuous metabolic linkages**  
2 **between ubiquitous free-living freshwater bacteria**

3 Sarahi L Garcia<sup>a\*</sup>, Moritz Buck<sup>a</sup>, Joshua J Hamilton<sup>b</sup>, Christian Wurzbacher<sup>c</sup>, Magnus Alm  
4 Rosenblad<sup>d</sup>, Katherine D McMahon<sup>b,e</sup>, Hans-Peter Grossart<sup>f,g</sup>, Falk Warnecke<sup>h,+</sup>, Alexander  
5 Eiler<sup>a</sup>

6 a Department of Ecology and Genetics, Limnology and Science for Life Laboratory, Uppsala University,  
7 Uppsala, Sweden

8 b Department of Bacteriology, University of Wisconsin-Madison, Madison, WI, USA

9 c Department of Biological and Environmental Sciences, University of Gothenburg

10 d Department of Marine Sciences, National Infrastructure of Bioinformatics, (NBIS), University of  
11 Gothenburg, Lundberg laboratory, Gothenburg, Sweden

12 e Department of Civil and Environmental Engineering, University of Wisconsin-Madison, Madison, WI,  
13 USA

14 f Leibniz-Institute for Freshwater Ecology and Inland Fisheries, Department Experimental Limnology,  
15 Stechlin, Germany

16 g Institute for Biochemistry and Biology, Potsdam University, Potsdam, Germany

17 h Jena School for Microbial Communication (JSMC) and Microbial Ecology Group at Friedrich Schiller  
18 University Jena, Jena, Germany

19 + Deceased

20 \* For correspondence and requests for materials E-mail S.L.G. (email: sarilog@gmail.com)

21

22 **Key words:** mixed-cultures / metagenomics / Actinobacteria / community / interactions

## 23 **Abstract**

24 Free-living microorganisms with streamlined genomes are very abundant in the environment.  
 25 Genome streamlining results in losses in the cell's biosynthetic potential generating  
 26 physiological dependencies between microorganisms. However, there exists no consensus  
 27 on the specificity of these microbial associations. To verify specificity and extent of these  
 28 associations, mixed cultures were established from three different freshwater environments.  
 29 These cultures contained free-living streamlined organisms lacking multiple biosynthetic  
 30 pathways. Among the co-occurring members of the mixed cultures, there was no clear  
 31 recurring pattern of metabolic complementarity and dependencies. This, together with weak  
 32 temporal co-occurrence patterns observed using time-series metagenomics, suggests that  
 33 free-living freshwater bacteria form loose and unspecific cooperative loops. Comparative  
 34 genomics suggests that the proportion of accessory genes in populations of streamlined  
 35 bacteria allows for flexibility in interaction partners. Altogether this renders these free-living  
 36 bacterial lineages functionally versatile despite their streamlining tendencies.

37

## 38 **Introduction**

39 Microorganisms can cooperate in many different ways and their relationships range from  
 40 facultative to obligate dependencies <sup>1</sup>. On the far end of the dependency spectrum are  
 41 endosymbionts (and endoparasites). These show obligate dependencies where genome  
 42 reduction and associated loss of essential biosynthesis pathways are widespread. In most  
 43 cases, a defined host - endosymbiont specificity is established. At the other end of the  
 44 spectrum, free-living bacteria are considered to be widely autonomous. However, this image  
 45 is now changing rapidly with frequent reports of reduced microbial genomes in the  
 46 environment resulting in unique and singular auxotrophies <sup>2</sup>.  
 47 In natural aquatic environments where nutrients generally occur in low concentrations,  
 48 microbes produce many compounds that are costly, but promote survival and reproduction  
 49 not only for themselves but also for neighboring cells <sup>3</sup>. In fact, auxotrophy for amino acids  
 50 and vitamins has recently been shown for numerous free-living bacteria <sup>4-6</sup>, pointing to  
 51 critically important metabolic dependencies from other community members as exemplified in  
 52 a simple model community <sup>7</sup>. Therefore, it would not be surprising that most natural aquatic

53 systems allow for frequent and complex metabolic interactions, for example, via continuous  
 54 mixing of the environment and molecular-scale diffusion facilitating distribution of public  
 55 goods. Hence, even when abundant environmental bacteria are seen as free-living, their  
 56 streamlined genomes render them tightly linked and dependent on other microorganisms<sup>8</sup> in  
 57 the community. The sheer number of bacteria and hence genetic variability in a population  
 58 could allow for high metabolic flexibility at the population level with an endless number of  
 59 metabolic interactions possible among free-living bacterial communities. However, the  
 60 character of these associations still remains largely unknown.  
 61 To investigate the specificity of the dependencies between free-living freshwater  
 62 microorganisms, we established dilution mixed cultures as model communities. These  
 63 cultures are a small subsample of the complex natural community<sup>9</sup> with about 12 initial cells.  
 64 About 600 of such mixed cultures were established and screened for a group of cosmopolitan  
 65 yet streamlined freshwater organisms from the Actinobacterial lineage *acl*. Here, we describe  
 66 six of these model communities and resolve their metabolic interaction potentials using  
 67 metagenomics. Finally, for a single mixed culture, we calculate co-occurrence patterns across  
 68 a metagenomics time-series in a lake to test if the observed dependencies are specific or if  
 69 the interaction-partners are flexible in more complex natural communities.

70

## 71 **Results and Discussion**

### 72 *Mixed cultures as model communities and their genomic reconstructions*

73 Ubiquitous freshwater Actinobacteria of the *acl* lineage were cultivated by diluting different  
 74 lake samples with triple-filtered sample water incubated in 96-well liquid culture plates. In  
 75 total, seven culture plates were set up and around forty-five wells contained *acl*. Of these,  
 76 only 6 cultures successfully propagated with densities comparable to those observed in the  
 77 environment (i.e.  $10^6$  cells ml<sup>-1</sup>) for subsequent transfers and growth in larger volumes. This  
 78 resulted in 6 dilution-to-extinction mixed cultures: FNEF8, FNEB6, FNEB7, FNED7, FSWF8  
 79 and TBE6 (FNE refers to Northeast basin of Lake Grosse Fuchskuhle, FSW to Southeast  
 80 basin of Lake Grosse Fuchskuhle and TB to Trout Bog Lake). Characterizations of FNEF8  
 81 have been published, previously<sup>7,10</sup>.

DNA was extracted from 4 L-cultures, and reads obtained by shotgun sequencing were assembled. Contigs > 1000 bp were considered for further analysis. In total, 77 metagenome assembled genomes (MAGs) were obtained from the assemblies (Supplemental). Of these, 31 MAGs each recruited more than 1% of the reads in the original metagenome. These MAGs have an average completeness of 83.5% as calculated by CheckM (Supplemental). It has been previously observed that because CheckM relies on lineage-specific marker genes, the completeness of genomes without lineage representation can often be underestimated<sup>5,7</sup>. However, since these MAGs have extremely high coverage and were assembled from model communities (low diversity of starter cells) we are confident of their high quality.

91

*Some free-living microorganisms fulfill their metabolic needs from those they happen to encounter*

Populations represented by the top 31 MAGs were assumed to be the dominant model community members and were analyzed further (mapping rates in Supplemental). All six cultures yielded at least one MAG of the cosmopolitan freshwater Actinobacteria *acl* (recruiting between 15% and 40% of reads), four cultures yielded a MAG of the freshwater Actinobacteria *aclIII* (between 3% and 9% of the reads), two cultures yielded yeast MAGs (1 and 3% of the reads), two cultures featured MAGs affiliated with Bacteroidetes (2% and 6% of the reads), two cultures yielded a Polynucleobacter MAG (3% and 55% of the reads), two cultures yielded a Spirochaetes MAG (8% and 22% of the reads), one culture yielded an Alphaproteobacteria MAG (1% of the reads) and one an Acidimicrobiales MAG (48% of the reads). Knowing that *acl* Actinobacteria do not grow in pure culture<sup>11</sup>, we now have strong support that the free-living *acl* is highly dependent on interactions with other microorganisms. Results from previous co-occurrence studies support the idea that free-living streamlined bacteria have very high connectivity in their environments and are critically dependent on metabolites that might be provided by the surrounding members of the planktonic communities<sup>8,12</sup>. Moreover, by creating an initial bottleneck<sup>13</sup> of approximately 12 cells, we obtained a first evidence that these plankton community partners do represent a diverse sets of community members. This hints towards a non-specific metabolic dependence of *acl* on other abundant freshwater bacteria, as no consistent interaction patterns were observed.

112 Since six mixed cultures might be not sufficient to generalize the character of the observed  
113 associations, we correlated the abundance of the mixed culture TBE6 MAGs with those  
114 obtained from a nine-year time-series shotgun metagenome from its source environment,  
115 Trout Bog Lake <sup>14</sup>. For this, we also used MAGs reassembled from this time-series data. The  
116 observed correlations indicate that *acl* interacts promiscuously and randomly (Figure 1,  
117 Figure S1 and S2). That is, no strong exclusive correlations can be discerned, either with the  
118 members of TBE6 or MAGs from the time-series, strengthening the hypothesis that *acl* is  
119 promiscuous in its interactions.

120

#### 121 *Tight metabolic dependencies between different free-living microorganisms*

122 Canonical central metabolic pathways such as glycolysis, the pentose phosphate pathway,  
123 the citric acid cycle, ammonia assimilation and oxidative phosphorylation are observed in  
124 each of the abundant MAGs of the microbial model communities, suggesting a mainly aerobic  
125 heterotrophic lifestyle (Supplemental). When looking at all extant *acl* MAGs and single-cell  
126 genomes (SAGs) <sup>15,16</sup>, auxotrophies for amino acids and vitamins were observed (Figure 2A).  
127 However, in the mixed cultures, at least one of the main members in each community was  
128 able to synthesize each of these metabolites, hinting to a high degree of metabolic  
129 dependency within the members of each model community of relatively low complexity. For  
130 example, in culture FNEB6, Bacteroidetes is the only producer of asparagine and so  
131 potentially supplies it to the other community members (see more examples in Figure 2B).  
132 Interactions at the level of amino acids and vitamins have been previously observed and  
133 described in several aquatic study systems <sup>4-6</sup>. Furthermore, one or two members of each  
134 model community had the ability to reduce sulfate, consistent with prior findings of the transfer  
135 of redox reaction products known as “metabolic handoffs” <sup>17</sup>. These kinds of observed  
136 dependencies merely represent a few examples of the many interactions that likely occur in  
137 the complex natural environment. In this respect, it was interesting that they also formed  
138 cross-domain linkages to two ubiquitous yeasts. We consider this as an indication that these  
139 interactions potentially can cross boundaries to eukaryotic plankton.

140

#### 141 *High degree of genomic diversity might support flexibility in interaction partners*

Our findings from analysis of genome content combined with prior evidence of high genome-level diversity within *acl*<sup>15</sup> prompted us to examine the variability in gene content among *acl* genomes. Interestingly, even when our cultures harbor a reduced diversity, all of our cultures contained more than one genotype of *acl*. This likely reflects the large genomic plasticity of this common and dominant free-living freshwater bacterium. This genomic plasticity, however, cannot be resolved with the short 16S rRNA gene fragments obtained in normal amplicon sequencing (Supplemental). Using all 33 *acl* Actinobacteria MAGs from our 6 mixed cultures in addition to the 14 available *acl* single cell amplified genomes (SAGs) (Figure S3), ~8000 orthologous gene clusters (OGCs) were found. The distribution of gene clusters in the genomes revealed that ~800 OGCs form the core genome of *acl* (Figure S4 and S5). Assuming around 1600 genes per *acl*<sup>15</sup>, this means that about half of the whole *acl* genome belongs to the flexible genome. This is around the same proportion as SAR11<sup>18</sup>. Thus, both *acl* and SAR11 have quite larger flexible genomes than other ubiquitous free-living aquatic bacteria like *Prochlorococcus*<sup>19</sup>. The paradox of *acl*'s streamlining tendencies is that their high number of auxiliary genes is likely to render populations of this free-living bacterial lineage functionally versatile.

In summary, as is the case for other streamlined free-living aquatic bacteria, *acl* Actinobacteria depend on numerous other abundant microorganisms for metabolic handouts. This kind of dependence seems to be non-taxa-specific or promiscuous since no consistent interaction patterns could be observed. These observations add to the knowledge on the structure of cooperation and dependencies between free-living aquatic microbes.

## Methods

### *Mixed culture and DNA extraction*

Mixed cultures that included the abundant and ubiquitous freshwater *Actinobacteria* were established in 2012 and 2013. Samples were collected from 5 different lakes: Lake Grosse Fuchskuhle (North East basin and South West basin), Lake Stechlin, Lake Dagow, Lake Mendota and from Trout Bog Lake (metadata reported in Supplementary Table). In total, seven plates were set up, two for Northeast basin (Lake Grosse Fuchskuhle) and one for

each of the other lakes (Southwest basin Lake Grosse, Lake Stechlin Lake, Lake Dagow, Lake Mendota and Trout Bog Lake. Cultivation method, media preparation, aqPCR assays, general observations and DNA extractions were as previously described for mixed culture FNE-F8<sup>10</sup>. Selected mixed cultures (based on cell density) were scaled up to a four-liter culture and DNA was extracted. DNA was sent to JGI and to Research and Testing Laboratory (RTL) (<http://researchandtesting.com/>) for shotgun metagenomic sequencing and 16S rRNA gene amplicon sequencing, respectively.

179

#### 16S rRNA gene amplicon sequencing

RTL performed PCR amplification and MiSeq sequencing of the 16S rRNA gene amplicons. The bacterial primers (*E. coli* positions) were 357wF (5'-CCTACGGGNGGCWGCAG-3') and 926wR (5'-CCGTCAATYMTTTRAGTTT-3'). All downstream analysis was done using the RTL standard pipeline from 2014. In brief all sequences were clustered at 4% divergence into OTUs using the UPARSE<sup>20</sup> algorithm. The centroid sequence from each cluster was then run against either the USEARCH global alignment algorithm or the RDP Classifier against a database of high quality sequences derived from the NCBI database. The output was then analyzed using an RTL internally developed python program that assigns taxonomic information to each sequence and then computes and writes the final analysis files.

190

#### Library preparation and sequencing

JGI performed the library preparation and the sequencing under Community Sequencing Project 1289. First, 100 ng of genomic DNA was sheared to 270 bp using a focused-ultrasonicator (Covaris). The sheared DNA fragments were size selected using SPRI beads (Beckman Coulter). The selected fragments were then end-repaired, A-tailed, and ligated of Illumina compatible adapters (IDT, Inc.) using KAPA-Illumina library creation kit (KAPA biosystems). The prepared sample library was quantified using KAPA Biosystem's next-generation sequencing library qPCR kit and run on a Roche LightCycler 480 real-time PCR instrument. The quantified library was then prepared for sequencing on the Illumina HiSeq sequencing platform utilizing a TruSeq paired-end cluster kit, v3, and Illumina's cBot instrument to generate a clustered flowcell for sequencing. Sequencing of the flowcell was

performed on the Illumina HiSeq2000 sequencer using Illumina TruSeq SBS sequencing kits, v3, following a 2x150 indexed high-output run recipe.

204

# *Genome assembly, annotations and metabolic features analysis*

After reads had been filtered based on their quality scores using sickle (version 1.210)<sup>21</sup>, the reads were digitally normalized using khmer 1.4<sup>22</sup> and assembled with megahit<sup>23</sup>. Coverage was computed by mapping back the reads competitively to the assembly using bbmap 35.40 (sourceforge.net/projects/bbmap/) using default parameters. Mapped reads were indexed and sorted using SAMtools 1.3<sup>24</sup> while we removed duplicates using picard-tools (version 1.101). Bedtools (version 2.18.2)<sup>25</sup> was used for computing coverage. For the binning metaBAT<sup>26</sup> was used. Tribe/taxonomical affiliation were defined using whole genome information and the public database using PhyloPhlAn<sup>27</sup> and using previously published genomes and SAGs<sup>16</sup> as references. If the MAGs belong to one of the freshwater tribes<sup>28</sup> they have the name of the tribe, otherwise the taxonomic name after NCBI is given.

For bacterial genomes, gene prediction analysis was performed within the Integrated Microbial Genomes (IMG)<sup>29,30</sup> platform developed by the Joint Genome Institute, Walnut Creek, CA, USA (<http://img.jgi.doe.gov>). Specific KEGG biosynthetic maps were inspected for completeness (<http://www.genome.jp/kegg/mapper.html>) counting number of missing enzymes from the most complete pathway. MAG completeness was calculated using CheckM<sup>31</sup>.

For fungal genomes, ab initio gene prediction was performed using augustus (v 2.5.5) with *Aspergillus nidulans* (FSWF8-4) or *Cryptococcus neoformans* (FNED7-22) models. Gene model ORFs were then annotated using matches to Pfam 30.0 (June 2016) by hmmscan (HMMER 3.1b2). Functional annotation was done using predicted aminoacids in the KAAS platform<sup>32</sup>.

227

# *Core genome computation*

Clusters of orthologous genes were identified using OrthoMCL<sup>33</sup> using default options following an established protocol. Core genome of the acl was computed using all 33 acl Actinobacteria MAGs from our 6 mixed cultures in addition to the 14 available acl single cell



232 amplified genomes (SAGs). Due to the incompleteness SAGs and MAGs, common methods,  
233 such as picking all the OGCs present in at least 90% of the genomes, are unsafe. To reduce  
234 the noise generated by incompleteness, a semi-supervised approach has been chosen. For  
235 this we compute a distance matrix based on the genomes that contain the different OGCs.  
236 Two OGCs will have a distance of 0.0 if they are found in the same genomes, and a distance  
237 of 1.0 if none of the genomes containing one also contains the other. The overlap between  
238 the genome sets of each cluster were computed and normalized to the smallest genome set.  
239 OGCs contained in less than 4 genomes were removed. The obtained distances are then  
240 used with a hierarchical clustering to compute a heatmap (Supplemental Figure acl core).  
241 This heatmap clearly shows a set of OGCs that overlaps significantly with all other OGCs, this  
242 cluster is selected as core. Core OGCs should have a strong overlap with all other OGCs  
243 irrelevant of their position in the heatmap.

244

#### 245 *Metagenome recruitment to MAGs*

246 A total of 113 metagenome samples from Trout Bog lake<sup>14</sup> were used in this study. As above,  
247 after assembly and binning, bbmap was used to compute the coverage of all the MAGs (from  
248 the time-series as well as the cultures), for all the time-points. All coverages have been  
249 normalized to sequencing depth. Mean coverage vectors of all MAGs are then correlated  
250 using Spearman correlation. For the heatmaps, MAGs from Trout Bog lake were only kept if  
251 they correlate with at least 0.6 to at least one MAG from our mixed culture TBE6 (positive or  
252 negative correlation). MAGs assembled from Trout Bog lake have not been further analyzed  
253 as they might represent an average population genome.

254

#### 255 **Competing financial interests**

256 The authors declare no conflict of interest

257

#### 258 **Acknowledgements**

259 In memory of Falk Warnecke, who believed in the power of mixed cultures and envisioned  
260 this manuscript already a few years ago. This work was supported by: the Swedish research  
261 council VR (grant 2012-4592), the German Science Foundation (grants DFG GR1540/ 17-1

and 21-1), the JSMC, the United States National Science Foundation Microbial Observatories program (MCB-0702395), the Long Term Ecological Research program (NTL-LTER DEB-1440297), and INSPIRE award (DEB- 1344254). JJH was supported by a USDA NIFA AFRI Postdoctoral Fellowship, award number 2016-67012-24709. We are also grateful to the Joint Genome Institute for supporting this work through the Community Sequencing Program (CSP) and providing technical support. The work conducted by the U.S. Department of Energy Joint Genome Institute, a DOE Office of Science User Facility, is supported by the Office of Science of the U.S. Department of Energy under Contract No. DE-AC02-05CH11231. Thanks to Alexandra Linz for her support with the TBE6 mixed culture. Thanks to staff at the Joint Genome Institute including Rex Malmstrom, Matthew Bendall, Tijana Glavina del Rio, Rob Eagan, and Susannah Tringe.

## References

- 1 Schink, B. Synergistic interactions in the microbial world. *Anton Leeuw Int J G* **81**, 257-261, doi:10.1023/A:1020579004534 (2002).
- 2 Giovannoni, S. J., Cameron Thrash, J. & Temperton, B. Implications of streamlining theory for microbial ecology. *ISME J* **8**, 1553-1565, doi:10.1038/ismej.2014.60 (2014).
- 3 Oliveira, N. M., Niehus, R. & Foster, K. R. Evolutionary limits to cooperation in microbial communities. *Proceedings of the National Academy of Sciences of the United States of America* **111**, 17941-17946, doi:10.1073/pnas.1412673111 (2014).
- 4 D'Souza, G. & Kost, C. Experimental Evolution of Metabolic Dependency in Bacteria. *PLOS Genetics* **12**, e1006364, doi:10.1371/journal.pgen.1006364 (2016).
- 5 Brewer, T. E., Handley, K. M., Carini, P., Gilbert, J. A. & Fierer, N. Genome reduction in an abundant and ubiquitous soil bacterium 'Candidatus Udaeobacter copiosus'. *Nature Microbiology* **2**, 16198, doi:10.1038/nmicrobiol.2016.198 (2016).
- 6 Giovannoni, S. J. Vitamins in the sea. *Proceedings of the National Academy of Sciences of the United States of America* **109**, 13888-13889, doi:10.1073/pnas.1211722109 (2012).
- 7 Garcia, S. L. *et al.* Auxotrophy and intrapopulation complementarity in the 'interactome' of a cultivated freshwater model community. *Molecular ecology* **24**, 4449-4459, doi:10.1111/mec.13319 (2015).
- 8 Milici, M. *et al.* Co-occurrence Analysis of Microbial Taxa in the Atlantic Ocean Reveals High Connectivity in the Free-Living Bacterioplankton. *Frontiers in microbiology* **7**, doi:UNSP 649 10.3389/fmicb.2016.00649 (2016).
- 9 Garcia, S. L. Mixed cultures as model communities: hunting for ubiquitous microorganisms, their partners, and interactions. *Aquatic Microbial Ecology* **77**, doi:10.3354/ame01796 (2016).
- 10 Garcia, S. L., McMahon, K. D., Grossart, H. P. & Warnecke, F. Successful enrichment of the ubiquitous freshwater actinobacteria. *Environ Microbiol Rep* **6**, 21-27, doi:10.1111/1758-2229.12104 (2014).
- 11 Salcher, M. M. & Šimek, K. Isolation and cultivation of planktonic freshwater microbes is essential for a comprehensive understanding of their ecology. *Aquatic Microbial Ecology* **77**, 183-196, doi:10.3354/ame01796 (2016).
- 12 Zelezniak, A. *et al.* Metabolic dependencies drive species co-occurrence in diverse microbial communities (vol 112, pg 6449, 2015). *Proceedings of the National*

309 *Academy of Sciences of the United States of America* **112**, E7156-E7156,  
310 doi:10.1073/pnas.1522642113 (2015).

311 13 Chuang, J. S., Rivoire, O. & Leibler, S. Simpson's Paradox in a Synthetic Microbial  
312 System. *Science* **323**, 272-275, doi:10.1126/science.1166739 (2009).

313 14 Bendall, M. L. *et al.* Genome-wide selective sweeps and gene-specific sweeps in  
314 natural bacterial populations. *ISME J*, doi:10.1038/ismej.2015.241 (2016).

315 15 Ghylin, T. W. *et al.* Comparative single-cell genomics reveals potential ecological  
316 niches for the freshwater actinobacteria lineage. *ISME J* **8**, 2503-2516,  
317 doi:10.1038/ismej.2014.135 (2014).

318 16 Garcia, S. L. *et al.* Contrasting patterns of genome-level diversity across distinct co-  
319 occurring bacterial populations. *bioRxiv*, doi:10.1101/080168 (2016).

320 17 Anantharaman, K. *et al.* Thousands of microbial genomes shed light on  
321 interconnected biogeochemical processes in an aquifer system. *Nat Commun* **7**,  
322 doi:ARTN 13219  
323 10.1038/ncomms13219 (2016).

324 18 Grote, J. *et al.* Streamlining and Core Genome Conservation among Highly Divergent  
325 Members of the SAR11 Clade. *Mbio* **3**, doi:ARTN e00252-12  
326 DOI 10.1128/mBio.00252-12 (2012).

327 19 Kashtan, N. *et al.* Single-Cell Genomics Reveals Hundreds of Coexisting  
328 Subpopulations in Wild *Prochlorococcus*. *Science* **344**, 416-420,  
329 doi:10.1126/science.1248575 (2014).

330 20 Edgar, R. C. UPARSE: highly accurate OTU sequences from microbial amplicon  
331 reads. *Nature methods* **10**, 996+, doi:10.1038/Nmeth.2604 (2013).

332 21 Joshi, N. A. & Fass, J. N. Sickle: A sliding-window, adaptive, quality-based trimming  
333 tool for FastQ files [Software]. Available at <https://github.com/najoshi/sickle>.

334 22 Crusoe, M. R. *et al.* The khmer software package: enabling efficient nucleotide  
335 sequence analysis. *F1000Res* **4**, 900, doi:10.12688/f1000research.6924.1 (2015).

336 23 Li, D., Liu, C. M., Luo, R., Sadakane, K. & Lam, T. W. MEGAHIT: an ultra-fast single-  
337 node solution for large and complex metagenomics assembly via succinct de Bruijn  
338 graph. *Bioinformatics* **31**, 1674-1676, doi:10.1093/bioinformatics/btv033 (2015).

339 24 Li, H. *et al.* The Sequence Alignment/Map format and SAMtools. *Bioinformatics* **25**,  
340 2078-2079, doi:10.1093/bioinformatics/btp352 (2009).

341 25 Quinlan, A. R. & Hall, I. M. BEDTools: a flexible suite of utilities for comparing  
342 genomic features. *Bioinformatics* **26**, 841-842, doi:Doi 10.1093/Bioinformatics/Btq033  
343 (2010).

344 26 Kang, D. D., Froula, J., Egan, R. & Wang, Z. MetaBAT, an efficient tool for accurately  
345 reconstructing single genomes from complex microbial communities. *PeerJ* **3**, e1165,  
346 doi:10.7717/peerj.1165 (2015).

347 27 Segata, N., Bornigen, D., Morgan, X. C. & Huttenhower, C. PhyloPhlAn is a new  
348 method for improved phylogenetic and taxonomic placement of microbes. *Nat*  
349 *Commun* **4**, 2304, doi:10.1038/ncomms3304 (2013).

350 28 Newton, R. J., Jones, S. E., Eiler, A., McMahon, K. D. & Bertilsson, S. A Guide to the  
351 Natural History of Freshwater Lake Bacteria. *Microbiol. Mol. Biol. Rev.* **75**, 14-49,  
352 doi:10.1128/mmbr.00028-10 (2011).

353 29 Markowitz, V. M. *et al.* IMG 4 version of the integrated microbial genomes  
354 comparative analysis system. *Nucleic Acids Res* **42**, D560-567,  
355 doi:10.1093/nar/gkt963 (2014).

356 30 Markowitz, V. M. *et al.* IMG/M 4 version of the integrated metagenome comparative  
357 analysis system. *Nucleic Acids Res* **42**, D568-573, doi:10.1093/nar/gkt919 (2014).

358 31 Parks, D. H., Imelfort, M., Skennerton, C. T., Hugenholtz, P. & Tyson, G. W. CheckM:  
359 assessing the quality of microbial genomes recovered from isolates, single cells, and  
360 metagenomes. *Genome Res*, doi:10.1101/gr.186072.114 (2015).

361 32 Moriya, Y., Itoh, M., Okuda, S., Yoshizawa, A. C. & Kanehisa, M. KAAS: an automatic  
362 genome annotation and pathway reconstruction server. *Nucleic Acids Research* **35**,  
363 W182-W185, doi:10.1093/nar/gkm321 (2007).

364 33 Li, L., Stoeckert, C. J. & Roos, D. S. OrthoMCL: Identification of ortholog groups for  
365 eukaryotic genomes. *Genome Research* **13**, 2178-2189, doi:10.1101/gr.1224503  
366 (2003).

367

## 368 **Data accessibility**

369 The raw shotgun metagenome reads are publicly available in the JGI portal and the assembly  
370 is available in IMG/MER under the ER submission IDs 26656, 26658, 26650, 29729, 29808,  
371 50227. The bacterial metagenome-assembled genomes (MAGs) are also available through  
372 IMG. The fungal MAGs have been deposited at DDBJ/ENA/GenBank. For taxon OID or  
373 accession number check supplementary material.

374

## 375 **Author contribution**

376 SLG and FW conceived the research. SLG and HPG collected and prepared the samples.  
377 SLG, MB, JJH, AE, CW and MAR analyzed the data. All authors wrote and/or revised the  
378 manuscript.

379

380 **Conflict of interest Statement:** The authors declare no conflict of interest.

381

## 382 **Titles and legends to figures**

383

384 **Figure 1.** Spearman correlation on normalized relative abundance between MAGs from TBE6  
385 and taxa in the epilimnion of the environment of origin (Trout Bog Lake). Metagenome  
386 samples from time-points from all years were used (45 unique dates). Correlation is displayed  
387 via hierarchical clustering. MAG names that start with a number refers to a MAG from the  
388 mixed culture (for details on these MAGs look at supplemental tables). MAG names that start  
389 with the words “time series” were previously binned from the Trout Bog nine year  
390 metagenome series <sup>14</sup>. The acl MAGs are highlighted in bold. To look into the correlations of  
391 hypolimnion and both combined look into the supplemental.

392

393 **Figure 2. A.** Visualization of the amino acid and vitamin biosynthetic potential of all acl MAGs  
394 and SAGs analyzed. It includes acl information from all MAGs binned from each culture in this  
395 study plus the previously published SAGs. Yellow lines indicate 0%, 50% and 100% of  
396 genomes analyzed. Completeness of a metabolic pathway was considered if 80% of the  
397 pathway was present. **B.** Potential metabolic complementarity among major members of each  
398 of the cultures. Circle plots are displayed for metabolites highlighted in bold in panel A plus  
399 potential to assimilate sulfate and sulfite. Colors indicate each mixed culture using same color  
400 scheme as in panel A. Arrow shows the direction in which the metabolite would be “shared”.  
401 Alpha – Alphaproteobacterium. Acidi – Acidimicrobium.

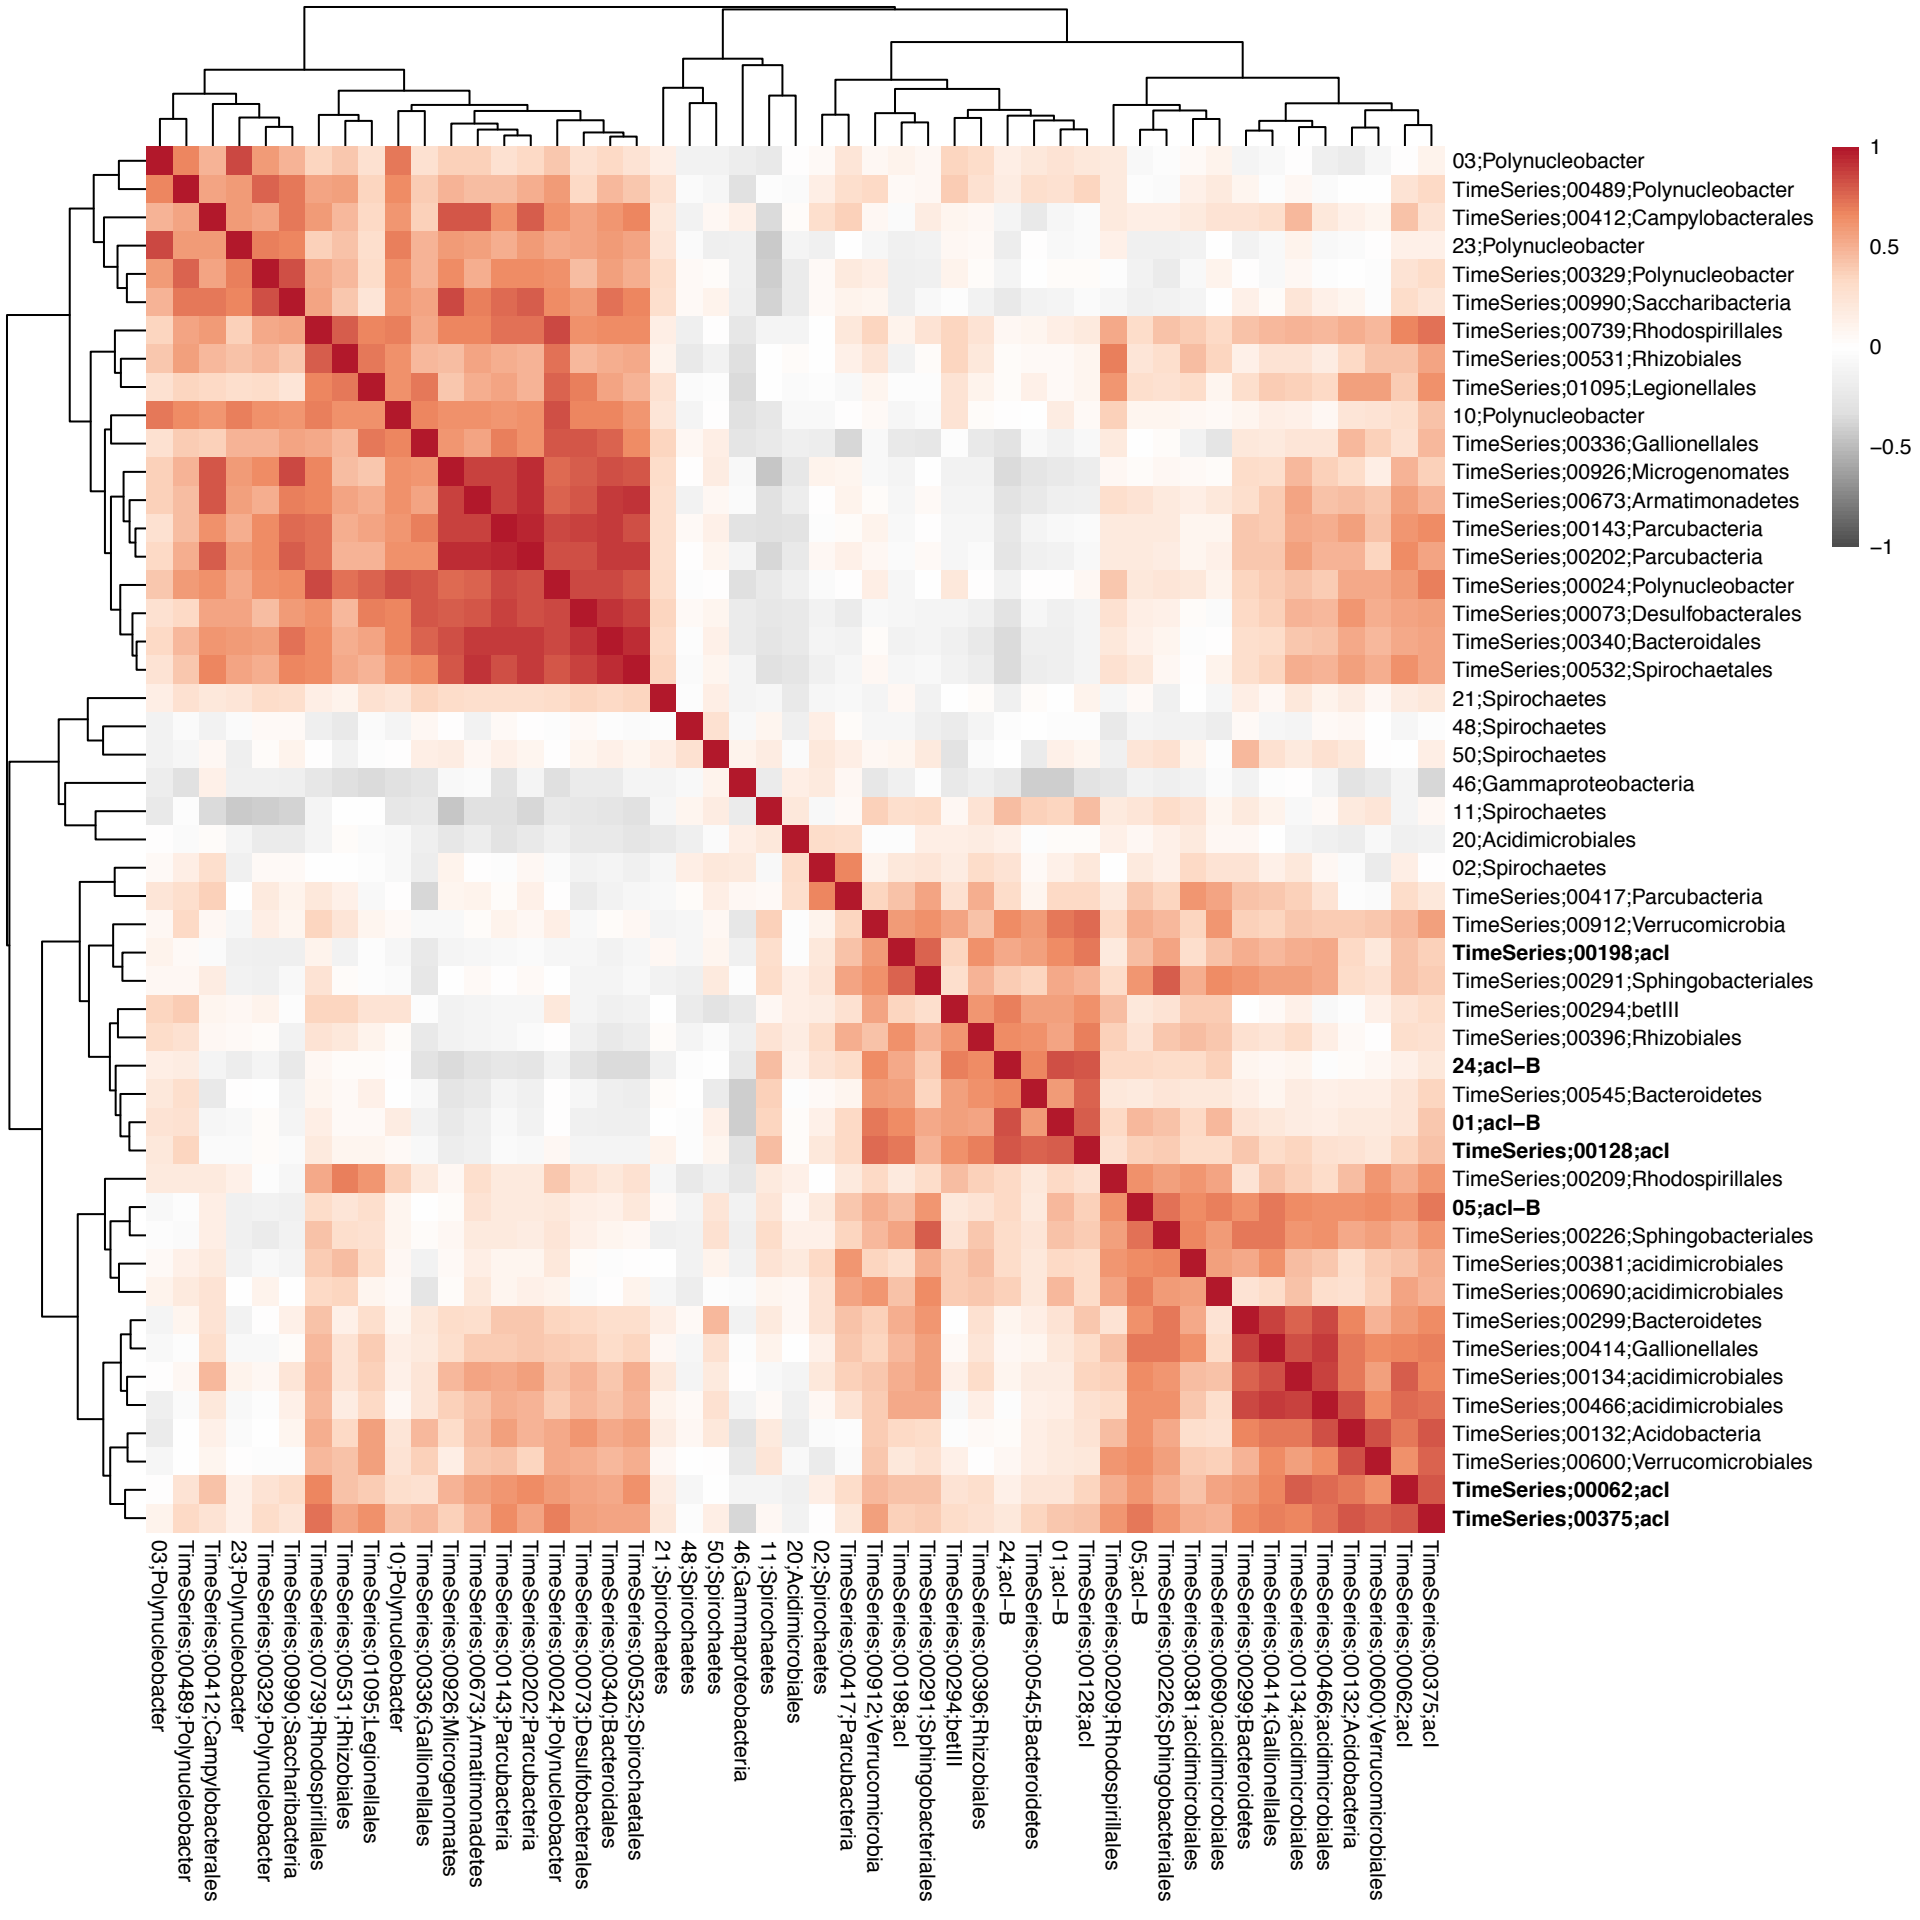

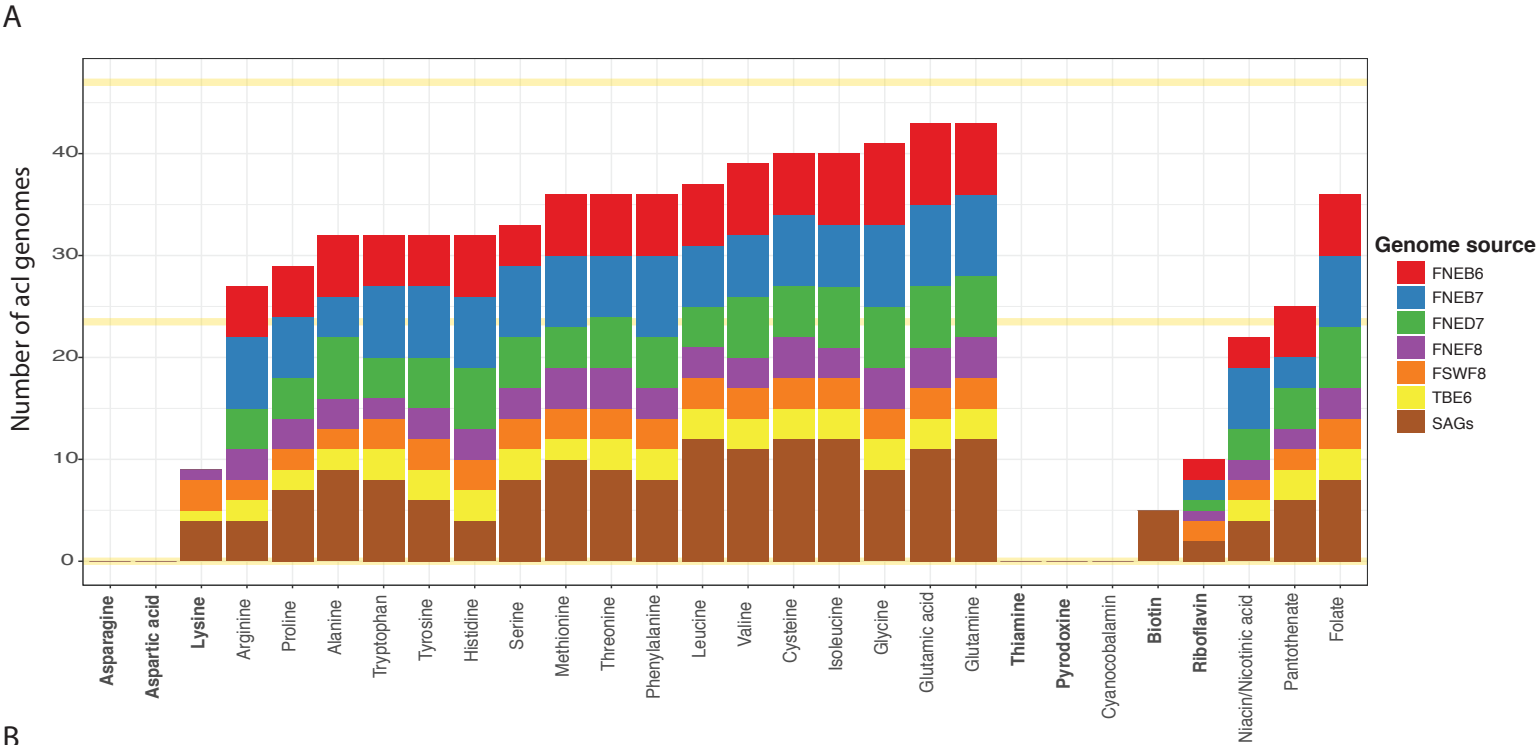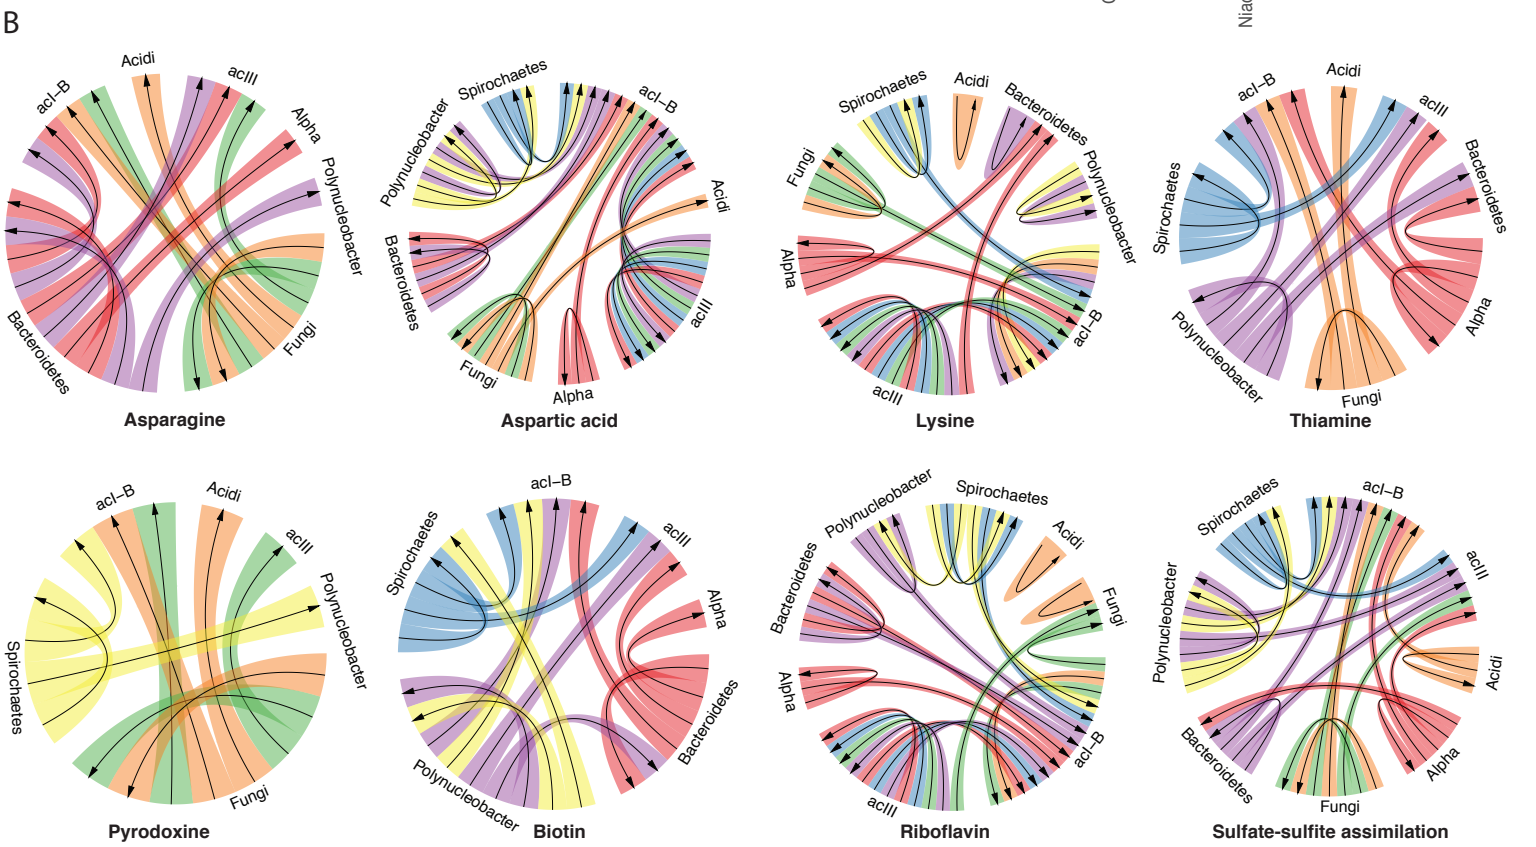

Source: http://biorxiv.org/content/10.1101/103838v1.full.pdf
